# Supplementary material for: Patterns of genetic structuring at the northern limits of the Australian smelt (Retropinna semoni) cryptic species complex
Source: PeerJ. 2018 May 3;6:e4654. doi: 10.7717/peerj.4654 (PMC5936633; doi:10.7717/peerj.4654)
Supplement: Data S1 [file peerj-06-4654-s006.xlsx]

## Sheet: Sheet1
Population name	Individual ID	BS18 Allele 1	BS18 Allele 2	BS3 Allele 1	BS3 Allele 2	BS4 Allele 1	BS4 Allele 2	BS5 Allele 1	BS5 Allele 2	BS22 Allele 1	BS22 Allele 2	BS20 Allele 1	BS20 Allele 2	BS21 Allele 1	BS21 Allele 2	BS24 Allele 1	BS24 Allele 2	BS8 Allele 1	BS8 Allele 2	MS24 Allele 1	MS24 Allele 2
MRD	M1301	151	166	177	192	118	131	100	146	173	173	132	144	183	191	147	147	248	248	256	281
MRD	M1302	151	166	149	173	127	131	100	159	167	185	120	144	171	183	147	149	0	0	263	263
MRD	M1303	166	166	192	192	118	127	100	100	135	135	142	144	171	175	147	147	232	232	265	284
MRD	M1304	151	180	173	196	0	0	95	100	0	0	139	144	171	183	145	147	248	276	261	286
MRD	M1305	153	170	173	196	136	136	100	159	135	135	0	0	171	171	145	145	0	0	0	0
MRD	M1306	166	189	173	188	118	127	95	155	135	167	120	144	171	183	0	0	0	0	0	0
MRD	M1307	166	189	180	192	118	131	100	100	163	165	132	142	175	181	147	147	248	248	273	284
MRD	M1308	151	193	192	196	118	136	100	100	135	167	144	151	183	191	147	147	232	248	263	263
MRD	M1309	142	187	149	169	118	136	95	100	135	171	132	144	171	183	147	147	248	248	273	273
MRD	M1310	151	166	173	196	118	127	100	100	135	169	120	142	183	191	147	147	228	248	261	279
MRD	M1311	153	166	173	177	0	0	100	100	135	135	132	144	171	183	147	147	232	248	273	284
MRD	M1312	151	189	149	169	127	136	100	155	135	175	142	142	173	183	147	147	248	248	265	265
MRD	M1313	151	182	188	192	131	140	100	100	161	169	120	142	171	181	147	147	248	248	258	286
MRD	M1314	151	166	177	192	118	140	95	100	135	163	132	144	0	0	147	147	248	248	279	279
MRD	M1315	166	166	0	0	118	127	100	100	163	167	142	142	0	0	147	147	248	280	261	273
MRD	M1316	174	189	173	177	127	131	128	155	171	173	0	0	0	0	145	145	248	248	284	284
MRD	M1317	151	151	180	192	118	140	100	100	135	171	125	146	171	179	147	151	248	284	263	286
MRD	M1319	166	178	180	207	118	131	100	100	161	175	112	144	0	0	145	145	0	0	261	281
MRD	M1320	151	189	180	192	104	140	100	100	135	163	139	144	171	171	147	149	0	0	261	261
MRD	M1321	166	200	149	177	131	140	100	155	167	169	144	144	171	183	145	147	232	252	254	281
MRD	M1322	151	151	165	192	127	131	95	100	167	204	144	144	171	179	147	147	248	248	265	273
MRD	M1323	151	151	173	177	118	127	0	0	135	135	0	0	171	187	147	147	232	260	258	265
MRD	M1324	153	195	149	196	118	127	100	100	167	204	120	120	171	175	147	147	232	248	263	263
MRD	M1325	166	180	149	188	127	127	100	100	135	167	144	144	0	0	145	145	0	0	263	263
MRD	M1327	0	0	180	192	136	136	0	0	171	171	144	144	179	183	145	147	0	0	279	284
MRD	M1332	0	0	153	196	127	131	95	100	167	171	120	139	171	183	145	145	272	284	0	0
MRU	M101	153	184	173	188	127	127	95	146	165	173	112	128	175	177	145	147	232	244	265	277
MRU	M102	180	191	169	177	118	127	95	137	158	158	151	151	181	183	145	151	240	256	267	279
MRU	M103	180	182	149	188	118	127	95	95	163	210	122	122	181	183	147	147	232	232	0	0
MRU	M104	153	153	149	157	118	136	100	132	202	204	122	151	0	0	145	145	0	0	0	0
MRU	M105	153	153	177	180	118	136	114	122	0	0	112	122	0	0	147	147	0	0	0	0
MRU	M106	153	180	149	192	118	118	100	137	163	171	120	142	181	181	145	145	232	276	261	271
MRU	M107	153	182	153	157	118	140	95	95	158	177	122	142	171	181	149	151	232	240	267	271
MRU	M108	184	187	153	188	127	136	95	164	169	190	0	0	171	181	147	147	232	240	0	0
MRU	M109	178	180	153	161	118	136	100	100	196	204	124	126	0	0	145	147	232	252	0	0
MRU	M110	155	187	180	184	118	140	95	137	163	194	120	122	181	181	147	147	232	232	277	277
MRU	M111	153	155	173	184	136	166	100	118	135	158	122	155	175	177	145	145	232	232	271	271
MRU	M112	182	184	169	184	127	145	90	151	163	177	120	122	0	0	145	147	232	248	0	0
MRU	M113	153	153	173	184	127	127	95	100	0	0	120	120	171	183	145	147	232	232	0	0
MRU	M114	178	180	0	0	118	131	128	128	161	171	112	125	177	177	147	149	232	256	265	271
MRU	M115	153	153	0	0	0	0	0	0	0	0	0	0	177	181	147	147	232	236	265	271
MRU	M116	157	184	153	196	122	140	100	118	158	165	112	151	177	181	145	151	228	236	258	281
MRU	M117	180	187	149	180	118	136	95	118	161	196	112	120	0	0	145	145	0	0	0	0
MRU	M118	153	166	173	192	127	136	95	128	135	158	120	127	173	183	0	0	0	0	0	0
MRU	M119	155	180	188	192	127	145	95	100	165	192	122	142	175	177	145	145	0	0	0	0
MRU	M120	170	191	184	192	118	136	109	128	163	200	122	132	0	0	0	0	0	0	0	0
MRU	M121	0	0	177	188	136	149	95	95	163	177	120	120	0	0	0	0	236	240	265	273
MRU	M125	146	170	0	0	108	127	109	118	0	0	122	142	171	191	147	147	232	232	258	261
MRU	M126	153	187	169	169	127	145	100	100	135	173	120	142	181	181	0	0	232	236	258	258
MRU	M127	180	191	177	192	118	127	95	95	135	135	118	122	175	179	145	145	232	252	263	265
MRU	M128	187	191	177	184	136	140	100	100	158	165	118	122	171	173	147	147	0	0	0	0
MRU	M129	166	180	157	173	0	0	95	118	135	158	125	142	0	0	0	0	0	0	0	0
MRU	M130	153	153	0	0	118	145	95	109	177	202	127	142	173	181	145	145	0	0	265	267
MRU	M131	153	191	153	173	118	149	95	109	0	0	112	122	181	189	0	0	240	252	0	0
MRU	M132	153	182	169	180	0	0	95	118	165	196	112	125	179	179	147	149	240	248	271	271
NSD	NS101	163	180	165	173	131	131	0	0	135	135	134	137	217	248	153	153	212	248	292	305
NSD	NS102	163	170	0	0	131	131	109	114	135	196	134	134	229	279	147	147	212	212	305	305
NSD	NS103	151	170	0	0	131	131	109	132	135	135	137	137	217	217	147	153	212	248	284	312
NSD	NS104	163	163	0	0	131	131	114	137	0	0	142	142	212	215	147	147	212	212	305	307
NSD	NS106	151	180	169	169	131	131	137	137	0	0	137	137	229	248	147	147	212	236	292	305
NSD	NS107	151	180	0	0	131	131	109	114	135	196	137	137	0	0	147	151	212	212	284	296
NSD	NS108	163	163	0	0	113	131	114	114	204	204	0	0	212	229	0	0	212	212	305	305
NSD	NS109	151	180	161	169	131	131	109	114	135	135	134	134	212	291	147	153	212	236	305	307
NSD	NS110	163	180	165	173	131	131	114	137	135	135	134	139	219	227	147	151	212	236	305	307
NSD	NS111	163	163	165	173	131	131	114	137	135	135	137	137	237	262	147	147	212	248	296	305
NSD	NS112	163	180	165	165	131	131	109	132	135	196	134	137	279	279	147	151	212	248	286	292
NSD	NS113	180	180	169	173	131	131	109	109	135	135	134	134	221	229	147	153	212	236	305	307
NSD	NS114	163	170	165	165	131	131	109	137	135	135	134	134	212	221	145	147	212	212	284	305
NSD	NS115	163	170	165	173	131	131	114	137	135	212	134	134	181	217	147	151	212	212	286	312
NSD	NS116	163	180	165	169	108	131	114	137	135	198	137	142	221	241	147	151	212	212	286	292
NSD	NS117	163	180	165	169	131	131	114	137	135	135	137	139	223	279	145	147	212	228	284	292
NSD	NS118	170	180	165	165	131	131	109	114	194	196	134	139	212	229	145	145	212	236	307	312
NSD	NS119	180	180	165	169	131	131	109	114	135	196	137	139	221	229	147	147	212	244	305	305
NSD	NS120	163	180	165	165	131	131	109	114	135	198	134	134	237	241	145	145	212	236	256	288
NSD	NS121	163	170	165	173	131	131	114	114	135	198	139	139	219	221	147	147	212	212	284	305
NSD	NS122	151	163	169	169	131	131	114	114	135	135	134	134	229	245	147	153	212	236	284	305
NSD	NS123	180	180	169	169	131	131	109	114	135	135	134	134	219	241	145	145	212	212	292	305
NSD	NS124	163	180	165	165	131	131	0	0	194	196	137	137	212	221	145	147	212	236	292	305
NSD	NS125	163	180	165	165	108	131	137	137	135	208	134	137	241	291	147	147	236	248	284	305
NSD	NS126	170	180	165	165	131	131	114	132	135	196	134	134	215	219	147	147	212	236	305	307
NSD	NS127	180	180	165	173	131	131	109	137	135	200	137	137	241	241	147	151	212	212	284	292
NSD	NS128	163	180	165	169	108	131	114	114	135	135	134	137	181	291	147	147	0	0	284	284
NSD	NS129	163	180	169	169	131	131	114	114	135	135	137	137	215	215	147	147	0	0	0	0
NSD	NS130	151	163	0	0	0	0	0	0	135	135	134	137	0	0	145	153	212	212	292	305
NSD	NS131	163	163	169	169	131	131	132	137	194	196	134	137	212	215	147	151	212	248	312	312
MLD	ML201	142	168	215	227	113	122	114	137	135	135	139	144	184	199	147	151	208	240	281	288
MLD	ML202	142	142	192	215	118	122	114	122	135	135	139	144	196	199	147	147	240	256	275	288
MLD	ML203	151	168	207	223	122	122	114	122	135	135	144	144	199	199	147	147	208	240	275	288
MLD	ML204	157	168	211	215	118	118	128	137	135	135	125	139	199	199	147	151	240	240	275	281
MLD	ML205	142	168	215	215	118	122	128	137	135	135	139	144	196	199	147	147	240	240	275	288
MLD	ML206	140	151	157	215	108	118	105	114	135	135	139	144	184	184	147	151	240	256	275	288
MLD	ML207	131	142	211	211	113	118	137	142	135	135	125	125	196	199	147	147	224	240	275	288
MLD	ML208	142	151	211	211	108	118	128	137	135	135	144	144	184	199	147	147	240	240	288	288
MLD	ML209	142	142	215	215	118	122	114	114	135	135	139	144	196	199	147	147	208	240	288	288
MLD	ML210	142	142	196	227	118	118	0	0	135	135	139	144	199	199	147	147	240	240	288	288
MLD	ML211	142	168	211	227	118	122	114	137	135	135	125	139	196	199	147	151	240	240	275	281
MLD	ML212	142	151	223	230	0	0	114	122	135	135	139	144	199	199	147	147	240	240	275	288
MLD	ML213	142	151	215	227	118	122	122	137	135	135	127	146	199	199	147	147	240	256	275	288
MLD	ML214	142	168	215	223	0	0	114	122	135	135	142	144	199	199	147	147	240	240	275	284
MLD	ML215	168	168	211	215	118	122	109	114	135	135	125	139	184	199	147	147	240	256	281	288
MLD	ML216	142	142	215	215	118	122	137	142	135	135	125	144	196	199	147	147	240	240	275	288
MLU	ML101	142	142	192	196	118	122	122	122	135	135	144	146	199	207	147	147	240	240	275	290
MLU	ML102	142	168	192	211	118	118	109	114	135	135	144	144	199	207	147	147	240	240	288	290
MLU	ML103	142	142	211	219	122	262	109	114	135	135	125	139	199	207	147	147	240	240	288	288
MLU	ML104	142	142	0	0	108	118	114	122	135	135	139	144	184	193	147	147	0	0	0	0
MLU	ML105	142	142	215	227	0	0	0	0	135	135	144	149	199	207	147	147	240	256	0	0
MLU	ML106	142	142	215	215	0	0	137	137	135	135	139	144	199	207	145	145	240	240	0	0
MLU	ML107	142	142	157	215	118	118	114	137	135	135	144	144	199	207	151	151	240	240	279	290
MLU	ML108	142	142	211	215	0	0	137	142	135	135	137	139	196	199	0	0	240	240	286	286
MLU	ML109	142	168	157	219	118	122	114	122	135	135	139	144	207	215	147	147	240	240	290	292
MLU	ML110	168	168	198	211	122	122	128	137	135	135	139	142	199	207	147	147	208	240	275	281
MLU	ML111	142	168	211	227	118	122	122	137	135	135	144	144	196	207	147	151	240	240	281	288
MLU	ML112	142	142	202	215	122	122	122	137	135	135	144	144	207	207	147	151	208	240	281	288
MLU	ML113	142	142	211	215	118	118	122	137	135	135	137	139	196	207	147	147	240	240	275	288
MLU	ML114	142	142	215	223	122	122	114	122	135	135	144	144	184	196	147	147	240	240	275	288
MLU	ML115	142	142	202	215	118	122	137	137	135	135	137	144	196	207	147	147	240	240	275	288
MLU	ML116	142	142	211	215	118	122	109	137	135	135	139	144	196	207	147	147	256	256	275	288
MLU	ML117	142	168	223	230	118	122	114	137	135	135	139	142	199	207	147	147	240	240	275	284
MLU	ML118	142	168	192	211	118	118	109	114	135	135	139	142	199	207	147	147	240	240	281	294
MLU	ML119	142	142	211	215	118	118	109	122	135	135	139	144	184	199	147	147	240	240	275	281
MLU	ML120	142	142	192	219	122	122	137	137	135	135	139	144	196	199	147	147	248	256	275	288
MLU	ML121	142	142	207	207	118	122	109	137	135	135	139	144	196	199	147	151	240	240	275	288
MLU	ML122	142	151	211	215	118	122	114	122	135	135	144	144	199	210	147	151	240	240	288	290
MLU	ML123	142	142	219	230	118	122	122	137	135	135	137	149	184	193	147	151	240	256	275	288
MLU	ML124	142	170	215	227	118	118	114	122	135	135	144	144	199	207	147	147	240	244	288	290
MLU	ML125	131	142	157	223	108	118	114	137	135	135	144	144	199	207	147	147	240	264	284	284
MLU	ML126	131	142	196	215	108	118	114	142	135	135	125	146	199	207	147	147	240	240	275	288
MLU	ML127	131	142	223	227	108	118	114	137	135	135	139	139	199	207	147	147	240	240	275	288
MLU	ML128	131	142	147	157	108	118	114	122	135	135	125	137	184	196	147	147	208	240	275	284
MLU	ML129	142	168	215	219	113	122	128	137	135	135	139	144	199	207	147	151	240	240	275	288
MLU	ML130	142	168	213	227	118	122	114	137	135	135	144	146	196	207	147	147	240	248	275	290
MLU	ML131	131	142	211	215	113	122	128	137	125	135	139	144	199	207	147	147	240	244	275	281
MLU	ML132	142	168	207	219	118	122	114	137	135	135	139	144	184	193	147	147	208	240	275	290
BRD	B901	151	151	157	184	145	145	118	168	145	145	134	149	157	175	155	157	220	240	252	256
BRD	B902	157	159	157	169	145	149	118	155	169	173	134	134	159	163	0	0	220	220	252	279
BRD	B903	157	159	184	200	140	140	118	155	161	165	127	132	163	163	153	157	220	232	252	256
BRD	B904	157	159	157	184	127	140	118	159	145	173	132	137	161	163	153	157	220	228	252	252
BRD	B905	157	159	149	200	127	136	155	168	158	161	122	137	165	173	159	159	220	220	252	252
BRD	B906	157	157	184	204	127	153	146	159	161	163	122	149	157	157	157	167	220	232	252	252
BRD	B907	157	157	153	200	127	169	109	128	145	165	122	122	155	159	153	165	224	224	252	252
BRD	B908	157	159	153	161	140	169	164	168	142	142	122	134	163	163	157	157	216	220	252	252
BRD	B909	151	159	140	144	127	131	132	132	145	145	122	127	0	0	157	157	220	220	252	252
BRD	B910	151	159	180	204	127	145	128	168	0	0	132	160	0	0	155	157	220	248	248	256
BRD	B911	151	157	153	161	127	145	151	164	0	0	122	134	0	0	0	0	220	220	0	0
BRD	B912	0	0	169	184	127	145	0	0	145	145	126	158	157	157	157	163	220	220	0	0
BRD	B913	0	0	173	184	127	149	0	0	0	0	122	134	0	0	155	157	220	224	0	0
BRD	B914	0	0	0	0	140	149	137	164	0	0	0	0	165	165	0	0	0	0	0	0
BRD	B915	157	157	157	184	145	173	155	155	142	173	122	149	165	165	153	157	220	220	0	0
BRD	B916	157	159	157	157	127	140	0	0	0	0	0	0	0	0	157	157	220	228	0	0
BRD	B917	159	159	169	180	122	140	132	155	161	175	137	158	163	173	157	163	220	220	250	252
BRD	B918	151	157	184	204	131	140	109	132	145	173	122	134	163	173	157	159	224	236	252	254
BRD	B919	151	159	143	153	127	127	151	155	161	161	134	158	157	163	157	159	220	220	248	252
BRD	B920	151	151	161	173	145	161	146	155	142	163	132	132	157	163	153	159	220	220	252	256
BRD	B921	151	151	161	180	149	169	144	155	161	165	134	134	163	163	159	165	220	220	248	254
BRD	B922	159	159	153	196	136	145	146	155	158	161	132	149	163	173	153	157	220	220	252	252
BRD	B923	157	159	140	140	127	140	155	164	145	165	122	127	157	163	153	163	220	220	248	252
BRD	B924	157	157	153	184	127	136	118	137	142	171	134	149	157	173	155	157	220	220	248	252
BRD	B925	151	157	143	153	118	127	132	168	142	161	122	132	163	173	155	157	220	232	248	252
BRD	B926	157	159	161	180	127	149	118	142	161	161	122	146	163	173	153	157	220	220	252	256
BRD	B927	151	157	153	157	136	169	159	164	161	173	122	160	157	173	157	157	220	220	252	252
BRD	B928	151	157	157	180	122	140	146	155	158	173	127	139	157	157	157	161	220	220	252	252
BRD	B929	159	159	180	200	122	127	155	168	161	175	127	137	163	173	157	157	220	220	250	252
BRD	B930	151	157	153	157	127	169	109	118	142	163	122	132	163	175	153	161	220	220	252	252
BRD	B931	157	159	153	157	122	153	118	146	145	175	122	137	163	173	157	163	220	220	250	252
BRD	B932	151	159	153	157	136	145	109	114	163	167	132	137	163	165	153	163	232	236	250	252
BRU	B701	151	159	157	196	127	140	128	151	142	167	132	132	163	173	159	161	220	228	252	252
BRU	B702	151	159	153	157	127	136	151	151	142	161	134	149	155	159	153	157	0	0	252	256
BRU	B703	157	159	153	165	127	145	168	180	167	169	132	164	157	173	153	161	220	228	0	0
BRU	B704	151	157	180	180	131	136	155	192	142	158	132	139	157	163	153	157	220	228	252	252
BRU	B705	151	157	157	165	127	140	118	155	142	145	132	132	157	157	153	153	0	0	256	258
BRU	B706	151	151	153	192	131	136	151	159	145	163	132	132	163	173	151	157	220	220	252	256
BRU	B707	151	151	153	192	131	136	151	159	145	163	132	153	163	173	151	157	220	220	252	256
BRU	B708	157	157	153	157	140	153	118	155	142	145	122	139	157	157	151	153	248	264	252	279
BRU	B709	157	157	153	153	127	136	109	155	163	165	132	149	157	167	159	161	220	220	258	284
BRU	B710	151	151	153	196	136	145	109	155	142	161	122	132	150	157	153	157	228	228	252	252
BRU	B711	151	157	157	157	131	145	118	155	145	145	149	153	0	0	0	0	0	0	252	258
BRU	B712	151	157	153	157	140	145	151	192	145	169	122	153	184	184	155	157	220	248	252	252
BRU	B713	151	157	157	165	127	127	128	146	167	169	122	139	157	163	153	157	220	228	252	256
BRU	B714	157	157	157	157	127	131	109	151	145	161	122	132	159	165	153	153	220	260	258	284
BRU	B715	151	159	157	180	127	136	137	159	142	165	127	134	157	173	153	157	228	232	252	252
BRU	B716	151	159	157	180	145	153	128	155	163	165	132	134	163	163	151	165	220	228	252	261
BRU	B717	159	159	153	180	134	145	151	155	161	161	122	139	157	159	151	155	220	220	252	252
BRU	B718	159	159	169	180	127	140	128	151	165	169	132	149	157	167	155	157	220	248	252	261
BRU	B719	157	157	157	196	127	136	151	180	165	167	134	146	157	165	157	157	228	228	248	252
BRU	B720	151	157	157	184	127	136	118	155	163	165	132	132	157	157	157	163	220	220	252	252
BRU	B721	159	159	147	157	136	153	118	128	163	167	132	134	157	167	157	157	220	232	252	263
BRU	B722	157	157	153	153	127	136	118	128	145	169	122	132	159	178	157	161	220	248	252	252
BRU	B723	151	157	147	157	127	136	118	155	161	163	130	132	157	182	153	157	220	228	252	263
BRU	B724	151	157	165	196	127	136	151	196	163	183	122	132	157	167	153	153	228	228	252	252
BRU	B725	0	0	0	0	127	136	128	151	145	158	132	132	157	165	151	155	220	248	256	261
BRU	B726	159	159	157	157	136	145	128	159	145	169	132	153	163	178	155	155	220	220	252	256
BRU	B727	151	157	165	173	127	153	118	164	163	169	132	139	163	182	153	153	220	220	252	284
BRU	B728	151	161	153	157	127	145	164	180	161	169	132	149	163	178	153	165	228	228	252	261
BRU	B729	157	159	157	165	136	145	118	118	145	169	122	134	157	157	153	157	220	220	252	252
BRU	B730	157	159	157	177	127	136	118	151	161	169	122	139	150	163	153	157	220	228	256	258
BRU	B731	159	159	165	192	145	145	155	192	163	163	122	149	157	157	151	163	220	220	252	284
BRU	B732	151	151	157	157	127	149	118	192	145	145	132	132	157	157	155	161	220	220	252	256
LAD	LA201	0	0	192	207	140	153	146	146	152	167	137	168	207	227	149	165	218	270	261	269
LAD	LA202	151	155	196	204	149	153	118	164	171	183	166	168	193	227	153	163	238	246	261	261
LAD	LA203	153	153	196	196	149	157	137	151	183	196	118	118	215	215	0	0	254	266	252	256
LAD	LA204	153	153	180	207	127	153	142	146	149	152	139	164	229	235	149	153	238	238	261	261
LAD	LA205	0	0	153	180	140	140	137	170	0	0	142	142	204	260	163	163	242	286	256	263
LAD	LA206	153	153	169	192	149	166	128	146	149	149	118	149	0	0	0	0	274	278	252	273
LAD	LA207	153	153	0	0	127	153	128	170	169	169	137	137	207	260	151	151	262	270	252	269
LAD	LA208	153	153	169	188	149	149	164	170	152	158	149	149	202	204	155	161	282	286	263	271
LAU	LA101	153	153	165	223	149	181	142	146	149	179	118	166	196	219	149	149	254	258	261	261
LAU	LA102	151	153	188	196	153	181	128	128	149	149	174	180	199	212	149	153	266	282	267	267
LAU	LA103	153	153	169	184	149	161	128	128	163	183	137	185	219	231	151	153	238	286	263	263
LAU	LA104	153	153	188	192	157	166	109	200	177	188	137	180	202	212	163	165	0	0	0	0
LAU	LA105	151	155	188	188	140	161	128	146	169	173	118	168	202	235	153	163	266	286	260	264
LAU	LA106	151	155	180	196	140	153	137	159	152	173	149	160	0	0	153	165	0	0	0	0
LAU	LA107	151	153	184	192	149	181	142	146	161	173	118	180	188	212	151	151	258	266	252	269
LAU	LA108	151	153	184	184	149	149	128	164	165	192	170	172	223	235	151	163	254	294	256	264
LAU	LA109	151	153	153	180	140	166	128	146	152	163	168	174	190	202	151	163	258	262	263	267
LAU	LA110	153	155	192	192	149	166	128	137	149	149	118	139	219	221	151	163	258	282	261	271
LAU	LA111	153	155	169	223	145	149	128	164	173	181	149	149	219	223	151	163	0	0	256	265
LAU	LA112	153	155	188	188	140	149	132	146	171	183	134	166	196	219	149	161	254	274	252	269
LAU	LA113	153	155	169	188	140	149	142	155	152	175	137	180	190	219	149	163	258	266	0	0
LAU	LA114	153	155	169	188	145	166	137	146	149	152	137	170	207	227	149	163	238	266	0	0
LAU	LA115	153	155	180	184	149	161	128	128	163	173	172	174	223	241	163	165	286	286	252	263
LAU	LA116	151	153	196	227	161	173	128	137	152	152	149	180	245	245	149	153	254	254	261	263
LAU	LA117	151	153	169	173	131	181	128	146	185	188	139	139	199	202	149	163	274	282	261	269
LAU	LA118	153	155	188	196	149	153	146	155	152	192	149	178	219	229	149	167	238	262	263	269
LAU	LA119	151	153	188	188	145	149	109	142	152	158	118	168	184	245	153	163	0	0	269	269
LAU	LA120	153	153	0	0	149	149	128	128	173	192	149	149	223	237	149	149	238	270	261	269
LAU	LA121	153	153	188	207	149	149	146	159	169	183	168	168	196	237	151	163	254	254	0	0
LAU	LA122	153	155	184	223	140	157	128	146	152	165	0	0	199	208	0	0	238	238	0	0
LAU	LA123	151	153	192	196	149	153	0	0	149	196	149	149	223	237	0	0	262	282	0	0
LAU	LA124	153	153	184	188	140	149	142	164	152	183	160	170	193	212	151	153	258	266	261	269
CMD	CM109	161	168	184	215	149	153	146	151	154	156	149	158	193	219	176	176	260	272	279	281
CMD	CM110	161	168	180	223	166	177	159	159	156	156	142	191	207	215	149	169	268	276	265	290
CMD	CM111	168	170	180	204	161	204	132	176	147	154	168	185	202	223	149	153	264	268	263	288
CMD	CM112	161	168	219	242	173	177	142	155	147	185	146	168	202	202	178	180	264	276	271	277
CMD	CM113	161	161	180	180	140	149	109	151	156	179	160	166	188	227	178	188	240	264	256	269
CMD	CM114	163	168	184	188	153	177	146	146	152	183	149	149	190	215	147	180	252	272	256	281
CMD	CM115	170	170	207	215	149	189	122	164	147	175	166	195	190	204	174	184	268	272	252	288
CMD	CM116	161	161	173	215	149	173	151	159	147	147	149	178	207	215	180	180	236	260	281	290
CMD	CM117	159	161	177	219	153	189	151	155	152	156	168	178	202	219	165	180	260	260	286	292
CMD	CM118	168	168	184	227	166	212	118	170	156	156	168	174	212	215	149	188	264	264	288	296
CMD	CM119	161	168	177	219	140	140	151	155	154	177	149	149	182	199	153	176	260	264	288	288
CMD	CM120	161	165	192	215	166	166	132	155	152	161	127	149	202	207	174	176	260	260	279	290
CMD	CM121	161	172	180	223	153	177	170	176	147	147	149	162	190	207	163	178	252	276	281	286
CMD	CM122	170	170	180	184	0	0	155	180	147	154	149	172	190	231	165	169	264	276	286	286
CMD	CM123	161	170	169	180	140	173	164	168	156	156	144	160	199	207	169	188	260	280	290	294
CMD	CM124	161	168	230	234	204	208	118	128	147	154	144	195	193	231	169	174	236	260	263	286
CMD	CM125	161	168	219	242	166	173	137	164	152	152	142	168	204	207	163	176	264	264	281	288
CMD	CM126	161	161	188	207	149	166	151	155	147	185	168	174	207	214	169	169	256	260	281	307
CMD	CM127	168	168	192	211	153	181	132	159	154	156	160	166	193	212	147	184	256	276	277	292
CMD	CM128	161	168	207	246	173	181	151	164	154	156	174	191	204	204	153	153	256	256	252	294
CMD	CM129	161	170	200	219	153	157	128	159	152	179	149	178	193	215	174	191	236	264	275	292
CMD	CM130	168	170	180	184	149	208	146	151	147	147	160	178	188	207	149	174	256	260	290	290
CMD	CM131	161	168	219	230	149	161	155	159	147	156	180	187	193	219	163	169	248	256	292	292
CMD	CM132	159	161	180	180	140	166	142	155	147	147	168	180	0	0	0	0	0	0	269	275
CMU	CM201	163	168	180	188	153	173	168	180	154	177	195	195	204	207	180	180	256	260	279	281
CMU	CM202	163	168	204	211	177	181	168	176	147	154	149	166	193	207	178	180	248	264	281	288
CMU	CM203	163	168	192	230	153	208	132	176	147	152	0	0	202	207	167	174	252	276	281	281
CMU	CM204	161	161	177	192	157	177	132	176	152	154	174	191	202	207	163	182	0	0	267	281
CMU	CM205	161	168	219	219	157	185	128	170	154	177	149	166	180	215	147	163	0	0	0	0
CMU	CM206	159	170	188	211	177	201	109	128	156	175	166	178	212	215	169	174	248	268	0	0
CMU	CM207	161	170	219	223	153	166	155	155	147	147	178	178	219	254	155	176	268	284	279	292
CMU	CM208	161	168	0	0	157	181	122	168	147	154	144	178	188	188	0	0	252	268	281	288
CMU	CM209	163	168	0	0	157	201	132	137	154	156	166	166	193	202	169	191	256	272	263	279
CMU	CM210	161	168	219	234	149	149	132	170	154	181	153	174	219	241	174	174	248	260	281	281
CMU	CM211	168	172	169	184	153	157	118	164	147	147	149	160	219	219	165	180	256	284	281	290
CMU	CM212	161	168	227	227	0	0	118	159	181	181	166	174	215	215	147	169	0	0	263	263
CMU	CM213	161	170	0	0	166	166	132	176	0	0	166	170	188	212	169	169	260	260	284	296
CMU	CM214	168	168	188	188	153	153	151	159	147	149	178	178	190	212	174	178	0	0	284	290
CMU	CM215	170	172	215	230	169	204	132	151	147	147	149	160	193	219	159	176	0	0	0	0
CMU	CM216	0	0	207	223	153	208	128	142	152	156	168	174	212	229	176	178	260	264	281	281
CMU	CM217	159	170	177	196	157	181	151	176	147	183	144	166	193	210	149	149	248	260	263	294
CMU	CM218	157	168	223	230	153	181	151	170	154	156	127	142	159	204	153	176	236	260	281	281
CMU	CM219	161	172	180	211	153	157	142	170	147	154	149	166	210	223	174	180	256	276	256	275
CMU	CM220	168	168	219	234	157	161	137	176	147	154	168	174	215	227	169	176	240	260	281	296
CMU	CM221	168	170	177	188	153	181	137	164	154	185	174	178	196	219	149	172	256	260	256	281
CMU	CM222	159	172	180	200	177	204	151	155	154	156	170	178	210	219	174	174	260	264	271	279
CMU	CM223	159	161	180	223	153	193	151	155	147	156	144	174	180	188	155	176	236	264	279	290
CMU	CM224	161	170	177	180	140	161	159	159	147	185	166	168	188	193	169	174	236	268	279	290
CMU	CM225	168	168	177	180	173	181	132	168	147	154	127	149	202	219	169	188	236	260	281	296
CMU	CM226	161	168	184	223	204	204	132	151	0	0	174	178	190	207	174	191	252	264	279	281
CMU	CM227	161	168	223	223	153	208	137	159	147	149	187	191	204	241	165	169	268	280	263	281
CMU	CM228	168	172	177	177	157	208	146	159	154	181	142	151	188	207	149	176	256	276	265	277
CMU	CM229	161	168	234	242	157	157	151	168	147	185	170	172	193	196	149	174	264	276	275	284
CMU	CM230	161	172	192	207	149	166	137	146	149	173	127	172	193	210	149	176	268	272	279	281
CMU	CM231	161	168	180	219	161	173	0	0	147	147	142	180	207	231	167	167	260	260	275	290
CMU	CM232	159	172	184	223	177	177	132	151	156	156	168	168	215	219	174	174	248	248	256	279
NRD	NR117	153	155	204	219	166	197	128	159	152	152	189	191	202	212	151	165	252	261	244	244
NRD	NR118	153	157	188	196	0	0	105	151	152	156	0	0	202	212	159	159	256	261	252	252
NRD	NR119	153	155	173	173	169	208	114	132	0	0	185	195	0	0	149	159	0	0	244	268
NRD	NR120	153	153	230	230	193	235	105	128	152	154	189	189	204	214	149	157	0	0	244	248
NRD	NR121	153	155	200	211	189	189	105	122	152	152	158	189	208	212	161	163	248	261	240	240
NRD	NR122	153	153	211	215	169	189	122	122	152	154	160	191	202	212	161	163	256	256	240	248
NRD	NR123	155	161	215	215	157	189	105	105	152	156	191	197	204	219	157	167	248	256	248	248
NRD	NR124	153	153	188	200	161	177	128	151	152	152	170	191	204	204	159	163	252	252	244	248
NRU	NR201	155	163	204	219	161	169	105	122	192	200	178	189	175	207	157	163	244	252	248	256
NRU	NR202	153	153	173	211	189	212	114	122	154	179	144	160	175	181	159	167	232	264	261	261
NRU	NR203	153	153	177	211	185	189	122	128	152	154	160	160	188	207	157	163	224	289	258	261
NRU	NR204	142	153	173	211	173	212	122	128	152	152	0	0	212	221	149	159	224	232	252	261
NRU	NR205	153	155	165	207	177	189	114	142	154	156	197	197	214	223	147	159	232	244	261	273
NRU	NR206	153	155	147	180	189	197	114	122	152	154	185	185	188	207	153	157	220	228	252	252
NRU	NR207	153	155	184	200	136	201	128	137	0	0	197	197	204	223	159	167	212	248	252	258
NRU	NR208	153	155	188	207	197	208	105	128	152	152	168	168	181	190	159	165	240	268	256	256
NRU	NR209	153	155	192	204	149	185	118	137	154	154	174	174	212	221	151	159	212	212	256	261
NRU	NR210	153	163	173	192	153	208	118	128	173	198	191	197	204	214	149	159	240	240	252	256
NRU	NR211	153	155	177	200	166	197	105	159	154	179	0	0	212	221	153	159	248	256	248	252
NRU	NR212	153	153	192	207	149	185	105	137	152	154	195	197	212	221	157	159	244	248	256	256
NRU	NR213	153	153	207	207	0	0	122	151	154	177	180	197	181	210	157	159	224	260	252	263
NRU	NR214	153	153	173	211	189	232	105	122	154	200	180	197	212	221	149	159	232	244	258	261
NRU	NR215	153	155	180	180	185	185	122	159	158	158	0	0	212	221	157	159	244	248	256	261
NRU	NR216	153	153	173	173	197	197	122	122	177	179	191	191	212	212	147	163	248	248	258	265
NRU	NR217	153	155	173	177	177	193	105	122	154	181	160	168	212	212	149	159	248	256	263	263
NRU	NR218	153	153	188	223	157	189	109	118	196	196	168	168	188	196	157	157	224	232	256	261
NRU	NR219	153	153	188	215	185	220	128	159	179	196	137	137	188	214	151	167	248	256	248	252
NRU	NR220	155	163	173	173	166	208	105	151	154	154	0	0	199	212	157	159	248	252	252	258
NRU	NR221	153	153	173	184	140	204	151	151	152	152	191	191	175	202	159	163	244	244	248	248
NRU	NR222	153	155	177	180	177	189	105	122	154	200	170	170	204	204	151	159	212	248	258	261
NRU	NR223	153	155	0	0	189	197	128	151	152	152	201	201	175	212	157	159	240	248	258	263
NRU	NR224	153	155	204	219	185	220	128	155	152	154	0	0	0	0	147	159	228	244	248	256
NRU	NR225	153	155	200	215	193	212	132	151	154	154	160	162	212	221	151	157	224	248	258	263
NRU	NR226	153	161	192	204	161	166	164	168	169	198	170	197	212	212	157	167	212	212	0	0
NRU	NR227	153	155	161	169	161	201	118	128	152	156	160	160	183	212	159	163	240	240	256	258
NRU	NR228	155	159	165	173	173	220	105	159	179	183	174	185	212	214	157	167	244	248	256	256
NRU	NR229	146	161	207	207	161	220	105	137	154	154	187	187	212	212	149	159	256	268	248	252
NRU	NR230	153	155	165	200	189	193	122	170	154	200	189	189	187	196	159	167	240	248	252	256
NRU	NR231	142	153	211	215	161	189	0	0	156	156	160	160	181	190	157	167	232	252	248	261
NRU	NR232	142	153	180	211	201	208	118	137	152	190	0	0	212	212	147	159	240	256	258	263
CRD	C201	153	157	161	165	216	228	122	122	147	152	158	158	202	214	149	155	216	248	261	265
CRD	C202	157	161	161	169	232	251	122	122	152	185	139	189	202	214	153	153	248	248	256	256
CRD	C203	153	161	192	196	181	239	114	132	154	154	158	162	214	214	151	155	244	276	256	261
CRD	C204	153	153	177	192	212	228	114	122	147	152	158	162	202	210	149	169	216	276	0	0
CRD	C205	153	157	161	169	232	232	122	122	147	152	162	191	181	181	151	157	236	276	258	261
CRD	C206	153	153	192	196	181	193	122	170	147	154	137	189	181	181	155	161	0	0	256	261
CRD	C207	153	157	192	196	204	235	122	132	152	154	162	162	214	214	155	169	244	248	256	256
CRD	C208	153	161	192	223	181	201	122	146	147	154	0	0	181	214	149	155	244	272	256	256
CRD	C209	153	153	165	165	204	212	122	122	152	185	158	191	223	260	151	151	244	244	261	261
CRD	C210	155	157	188	192	212	220	122	132	177	185	164	168	202	202	155	169	264	272	261	261
CRD	C211	153	157	161	192	181	204	122	155	147	171	158	162	214	214	149	149	224	244	256	256
CRD	C212	153	161	161	177	201	212	122	128	147	152	185	187	193	207	147	163	248	248	256	261
CRD	C213	153	163	161	188	201	201	122	137	152	188	162	197	177	202	151	151	244	276	256	256
CRD	C214	161	161	165	188	212	212	114	137	147	158	168	168	202	223	147	155	228	244	256	261
CRD	C215	153	161	161	180	181	228	122	137	152	152	168	170	202	202	151	155	248	272	256	258
CRD	C216	153	153	188	192	181	208	122	132	152	154	164	197	196	214	151	155	236	248	261	261
CRD	C217	153	157	161	169	201	201	114	146	147	152	158	162	214	223	151	161	244	248	256	256
CRD	C218	153	153	165	188	0	0	122	155	152	154	139	158	214	223	163	163	224	224	252	261
CRD	C219	153	153	161	169	181	193	122	122	147	152	153	162	175	210	155	169	236	276	256	261
CRD	C220	153	153	153	161	208	212	114	122	147	154	162	172	202	214	153	157	236	272	261	261
CRD	C221	153	161	165	196	212	243	122	137	152	177	139	162	202	202	151	161	236	244	256	265
CRD	C222	153	157	161	188	153	181	122	137	185	190	153	162	214	223	167	169	244	248	252	261
CRD	C223	148	153	184	196	204	220	122	155	152	152	162	168	196	214	151	153	244	268	256	279
CRD	C224	153	161	169	192	212	262	122	168	154	154	153	162	223	223	149	161	248	272	252	265
CRD	C225	153	157	0	0	185	185	122	128	147	147	158	162	181	202	151	163	0	0	256	256
CRD	C226	161	163	196	223	177	208	122	122	158	158	174	197	196	202	149	155	224	252	252	258
CRD	C227	0	0	196	223	208	235	114	122	154	154	153	153	181	260	151	163	0	0	261	265
CRD	C228	153	155	169	200	181	212	114	122	169	177	162	164	214	254	155	165	0	0	256	261
CRD	C229	153	153	169	177	185	243	146	151	152	152	162	162	202	210	151	155	244	264	256	261
CRD	C230	0	0	0	0	204	216	122	137	0	0	0	0	177	202	151	163	0	0	0	0
CRD	C231	153	153	161	188	201	239	114	155	147	188	164	168	0	0	153	169	0	0	256	256
CRD	C232	0	0	165	177	177	239	122	122	152	171	180	180	214	214	151	163	0	0	261	261
CRU	C101	0	0	153	188	153	228	122	122	147	154	153	162	214	214	155	155	228	244	256	256
CRU	C102	153	153	192	196	185	201	122	122	152	188	153	158	196	260	153	155	228	244	256	256
CRU	C103	153	153	188	192	204	235	114	122	147	152	158	162	196	214	155	163	244	272	256	261
CRU	C104	161	163	165	165	153	235	0	0	147	152	158	201	214	223	157	169	244	268	256	256
CRU	C105	153	153	188	188	197	224	114	122	152	154	180	187	214	227	149	155	224	236	261	261
CRU	C106	153	153	177	196	228	235	114	122	152	177	153	201	181	210	0	0	248	276	256	256
CRU	C107	153	153	153	165	204	216	128	128	147	152	168	168	214	214	151	151	224	236	256	265
CRU	C108	153	153	161	192	153	177	122	170	147	188	164	187	181	214	155	157	228	248	256	256
CRU	C109	153	157	153	161	212	224	122	132	147	147	139	162	0	0	163	163	216	264	256	261
CRU	C110	153	153	169	188	0	0	122	122	0	0	158	191	202	214	155	167	236	244	252	261
CRU	C111	153	153	161	169	153	189	114	122	152	154	180	191	181	202	155	155	244	260	261	261
CRU	C112	153	153	161	161	204	228	122	122	152	154	158	191	214	227	151	169	268	272	0	0
CRU	C113	153	161	161	169	212	216	122	128	147	171	0	0	177	214	151	169	244	272	256	256
CRU	C114	153	161	161	169	208	220	122	122	152	185	170	191	181	245	0	0	240	248	252	252
CRU	C115	153	161	169	223	185	204	128	164	177	188	162	180	181	214	149	149	240	244	256	256
CRU	C116	153	153	165	173	193	216	122	137	152	188	158	191	207	210	149	155	236	244	256	261
CRU	C117	153	153	169	223	153	201	122	137	147	152	0	0	180	214	163	169	244	260	256	256
CRU	C118	153	153	161	165	189	251	122	128	147	152	180	180	202	214	147	147	248	264	256	261
CRU	C119	153	153	161	165	212	232	137	155	154	171	139	162	196	214	153	161	248	276	261	261
CRU	C120	153	153	161	188	197	212	114	128	147	185	168	187	175	260	163	169	236	268	256	256
CRU	C121	153	153	180	223	0	0	122	122	0	0	180	197	202	214	151	155	236	248	256	261
CRU	C122	153	161	161	192	204	216	122	137	0	0	162	166	177	177	149	155	236	272	252	258
CRU	C123	153	157	169	196	189	189	122	128	154	154	139	180	202	210	151	163	216	276	258	261
CRU	C124	157	161	188	223	185	216	122	137	152	152	153	162	202	214	149	151	244	244	261	261
CRU	C125	155	161	161	223	153	216	132	137	158	188	162	201	181	214	161	169	244	264	256	261
CRU	C126	153	155	0	0	185	212	114	122	152	188	160	168	181	202	153	163	236	276	256	261
CRU	C127	153	153	169	192	177	181	122	122	147	171	153	187	181	210	149	149	248	272	261	261
CRU	C128	153	153	161	207	208	239	122	122	152	152	0	0	181	214	167	167	244	248	256	261
CRU	C129	157	161	161	177	216	228	122	128	154	154	164	168	181	214	149	151	248	268	261	261
CRU	C130	153	153	0	0	185	204	114	122	0	0	153	153	181	210	151	165	244	244	256	261
CRU	C131	153	163	161	169	181	216	122	122	152	177	187	197	202	210	155	159	0	0	0	0
CRU	C132	153	153	161	169	204	208	122	137	152	154	162	166	181	202	153	163	244	272	263	265
